# Supplementary material for: Reaction of a nitrosyl complex of Mn(ii)–porphyrinate with superoxide: NOD activity is favoured over SOD activity
Source: Royal Society of Chemistry journal article supplement (doi:10.1039/d3dt00570d), 2023-01-01
Supplement: d3dt00570d1.pdf [file d3dt00570d1.pdf]

**Supporting Information**  
**for**  
**Reaction of a Nitrosyl Complex of Mn(II)-porphyrinate with Superoxide:**  
**NOD Activity is More Favorable Over SOD Activity**

Rakesh Mazumdar, Shankhadeep Saha, Bapan Samanta, Riya Ghosh, Sayani Maity, Biplab Mondal\*

*Department of Chemistry, Indian Institute of Technology Guwahati, North Guwahati, Assam -781039, India. Phone: +91-361-258-2317; Fax: +91-3612582339. Email: biplab@iitg.ac.in*

**Table of contents**

| Sl. No. | Description                                                                                                                                          | Page No. |
|---------|------------------------------------------------------------------------------------------------------------------------------------------------------|----------|
| 1       | <b>Figure S1.</b> FT-IR spectrum of ligand <b>TMPPH<sub>2</sub></b> in KBr.                                                                          | S3       |
| 2       | <b>Figure S2.</b> ESI-mass spectrum of ligand <b>TMPPH<sub>2</sub></b> in acetonitrile.                                                              | S3       |
| 3       | <b>Figure S3.</b> <sup>1</sup> H NMR spectrum of ligand <b>TMPPH<sub>2</sub></b> in CDCl <sub>3</sub> .                                              | S4       |
| 4       | <b>Figure S4.</b> <sup>13</sup> C NMR spectrum of ligand <b>TMPPH<sub>2</sub></b> in CDCl <sub>3</sub> .                                             | S4       |
| 5       | <b>Figure S5.</b> FT-IR spectrum of complex <b>1a</b> in KBr.                                                                                        | S5       |
| 6       | <b>Figure S6.</b> ESI-mass spectrum of complex <b>1a</b> in acetonitrile. [Inset: (a) experimental and (b) simulated isotopic distribution pattern]. | S5       |
| 7       | <b>Figure S7.</b> UV-visible spectrum of complex <b>1a</b> in dichloromethane at RT.                                                                 | S6       |
| 8       | <b>Figure S8.</b> X-band EPR spectrum of complex <b>1a</b> in dichloromethane at 77K.                                                                | S6       |
| 9       | <b>Figure S9.</b> ORTEP diagram of complex <b>1a</b> (30% thermal ellipsoid plot, H-atoms are omitted for clarity).                                  | S7       |
| 10      | <b>Figure S10.</b> FT-IR spectrum of complex <b>1</b> in KBr.                                                                                        | S7       |
| 11      | <b>Figure S11.</b> ESI-mass spectrum of complex <b>1</b> in acetonitrile. [Inset: (a) experimental and (b) simulated isotopic distribution pattern]. | S8       |
| 12      | <b>Figure S12.</b> UV-visible spectrum of complex <b>1</b> in dichloromethane at RT.                                                                 | S8       |
| 13      | <b>Figure S13.</b> <sup>1</sup> H NMR spectrum of complex <b>1</b> in DMSO-d <sub>6</sub> .                                                          | S9       |
| 14      | <b>Figure S14.</b> X-band EPR spectrum of complex <b>1</b> in THF at 77K.                                                                            | S9       |
| 15      | <b>Figure S15.</b> Cyclic voltammograms of complex <b>1</b> in dichloromethane vs. Ag/AgCl, supporting electrolyte 0.1 M TBAP, Scan rate 0.1 v/s.    | S10      |
| 16      | <b>Figure S16:</b> UV-visible spectrum of the reaction mixture of complex <b>1a</b> and <i>t</i> BuOOH at -40 °C in THF.                             | S10      |
| 17      | <b>Figure S17.</b> FT-IR spectrum of complex <b>2</b> in KBr.                                                                                        | S11      |
| 18      | <b>Figure S18.</b> ESI-mass spectrum of complex <b>2</b> in acetonitrile. [Inset: (a) experimental and (b) simulated isotopic distribution pattern]. | S11      |
| 19      | <b>Figure S19.</b> UV-visible spectrum of complex <b>2</b> in THF.                                                                                   | S12      |
| 20      | <b>Figure S20.</b> X-band EPR spectrum of complex <b>2</b> in THF at 77K.                                                                            | S12      |
| 21      | <b>Figure S21.</b> ESI-mass spectrum of 2,4-di- <i>tert</i> -butyl-6-nitrophenol in acetonitrile.                                                    | S13      |
| 22      | <b>Figure S22.</b> <sup>1</sup> H NMR spectrum of 2,4-di- <i>tert</i> -butyl-6-nitrophenol in CDCl <sub>3</sub> .                                    | S13      |

|    |                                                                                                                     |     |
|----|---------------------------------------------------------------------------------------------------------------------|-----|
| 23 | <b>Figure S23.</b> $^{13}\text{C}$ NMR spectrum of 2,4-di- <i>tert</i> -butyl-6-nitrophenol in $\text{CDCl}_3$ .    | S14 |
| 24 | <b>Figure S24.</b> ESI-mass spectrum of 9-fluorenone in acetonitrile.                                               | S14 |
| 25 | <b>Figure S25.</b> $^1\text{H}$ NMR spectrum of 9-fluorenone in $\text{CDCl}_3$ .                                   | S15 |
| 26 | <b>Figure S26.</b> $^{13}\text{C}$ NMR spectrum of 9-fluorenone in $\text{CDCl}_3$ .                                | S15 |
| 27 | <b>Figure S27.</b> ESI-mass spectrum of $\text{tmpNO}_3$ in acetonitrile.                                           | S16 |
| 28 | <b>Figure S28.</b> $^1\text{H}$ NMR spectrum of $\text{tmpNO}_3$ in $\text{CDCl}_3$ .                               | S16 |
| 29 | <b>Figure S29.</b> $^{13}\text{C}$ NMR spectrum of $(\text{tmp})(\text{NO}_3)$ in $\text{CDCl}_3$ .                 | S17 |
| 30 | <b>Figure S30.</b> ORTEP diagram of $\text{tmpNO}_3$ (30% thermal ellipsoid plot, H-atoms are omitted for clarity). | S17 |
| 31 | <b>Table S1.</b> Crystallographic data for complex <b>2</b> .                                                       | S18 |
| 32 | <b>Table S2.</b> Selected bond lengths ( $\text{\AA}$ ) of complex <b>2</b> .                                       | S18 |
| 33 | <b>Table S3.</b> Selected bond angles ( $^\circ$ ) of complex <b>2</b> .                                            | S19 |

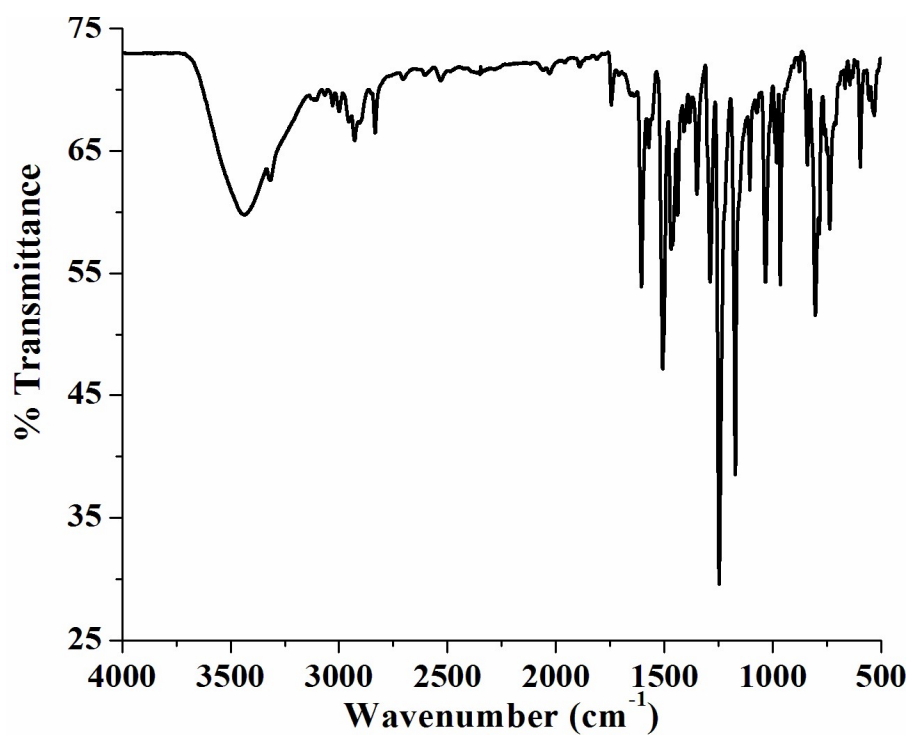

**Figure S1.** FT-IR spectrum of ligand  $\text{TMPPH}_2$  in KBr.

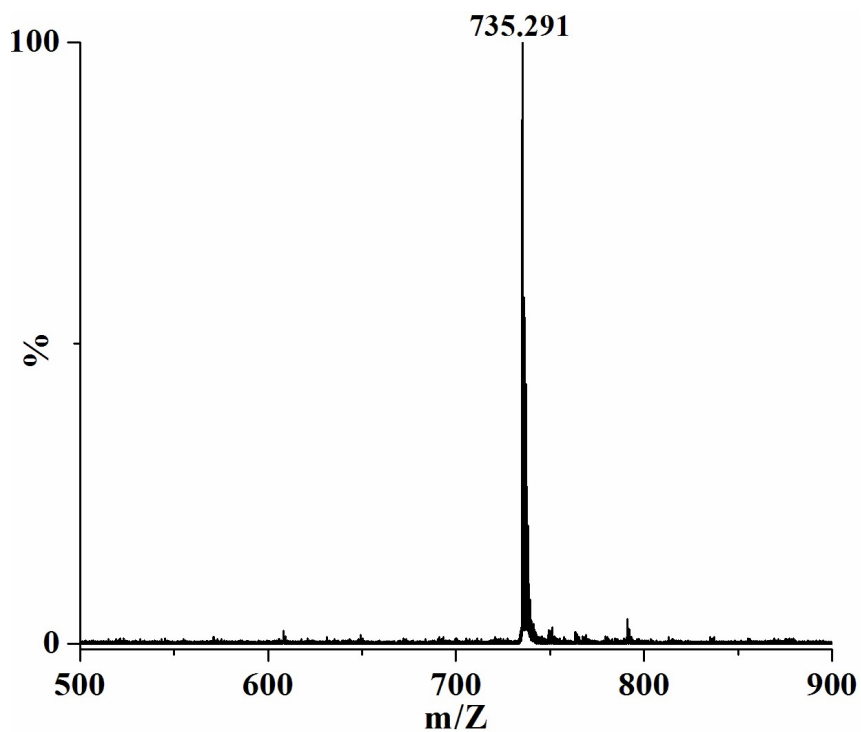

**Figure S2.** ESI-mass spectrum of ligand  $\text{TMPPH}_2$  in acetonitrile.

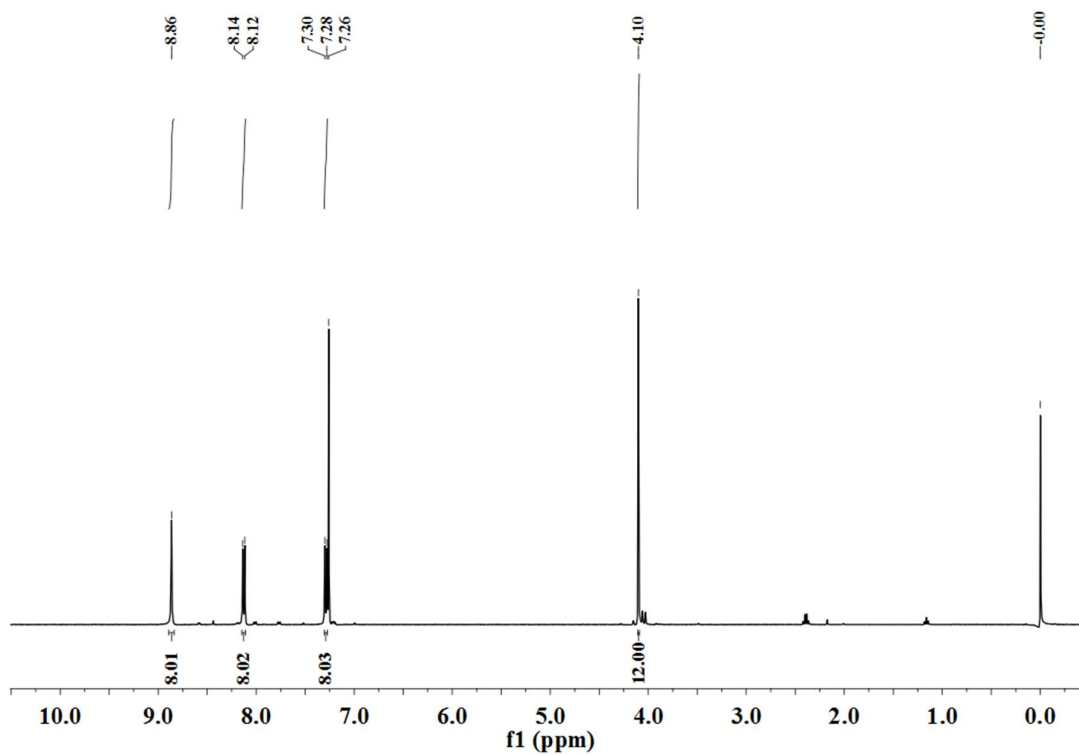

Figure S3.  $^1\text{H}$  NMR spectrum of ligand  $\text{TMPPH}_2$  in  $\text{CDCl}_3$ .

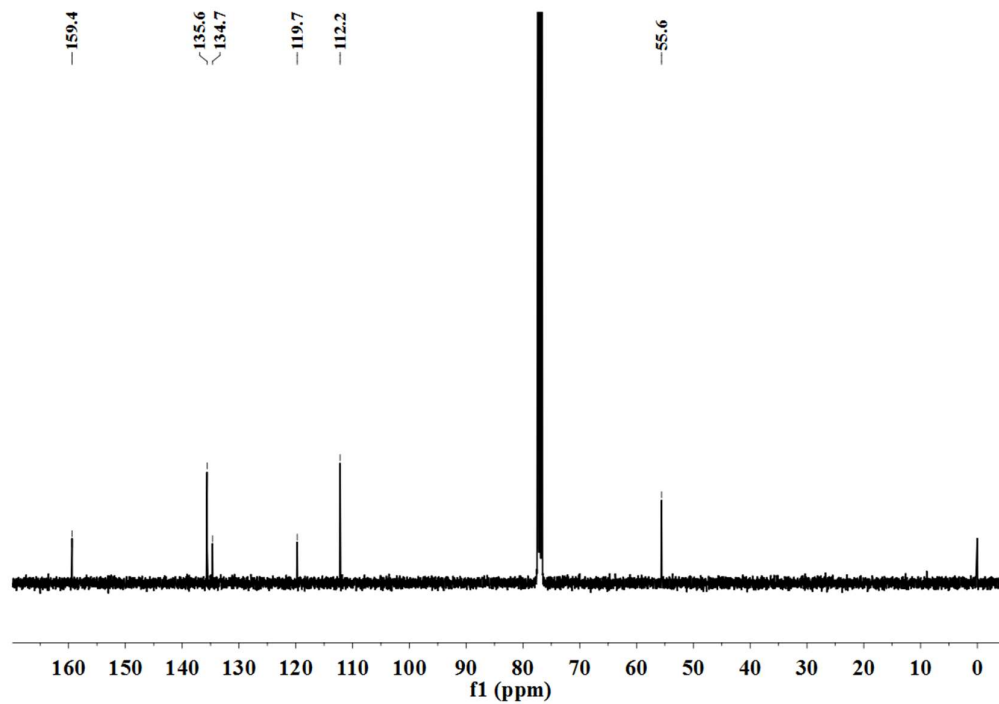

Figure S4.  $^{13}\text{C}$  NMR spectrum of ligand  $\text{TMPPH}_2$  in  $\text{CDCl}_3$ .

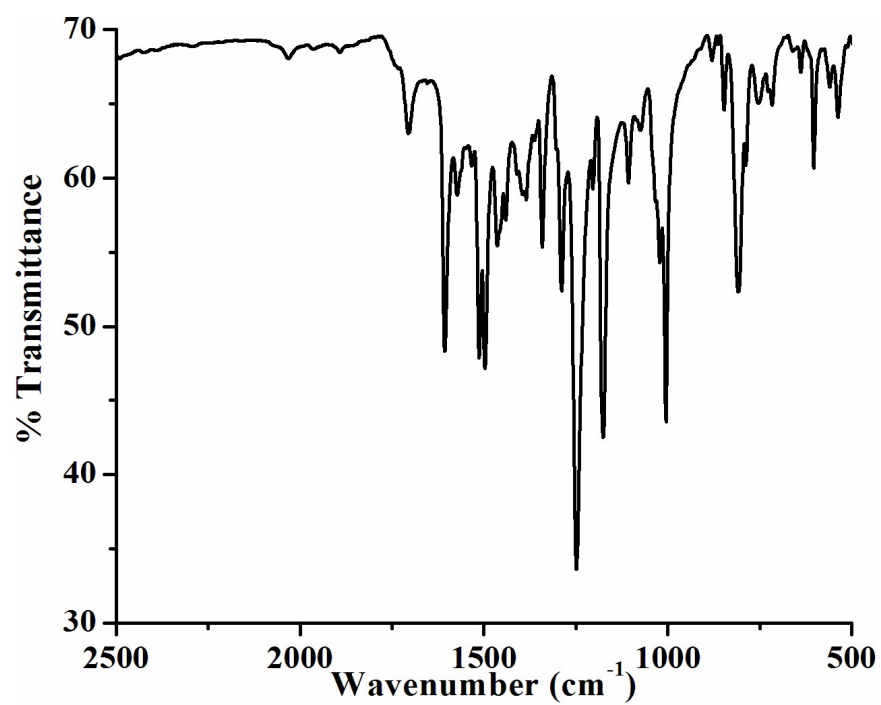

**Figure S5.** FT-IR spectrum of complex **1a** in KBr.

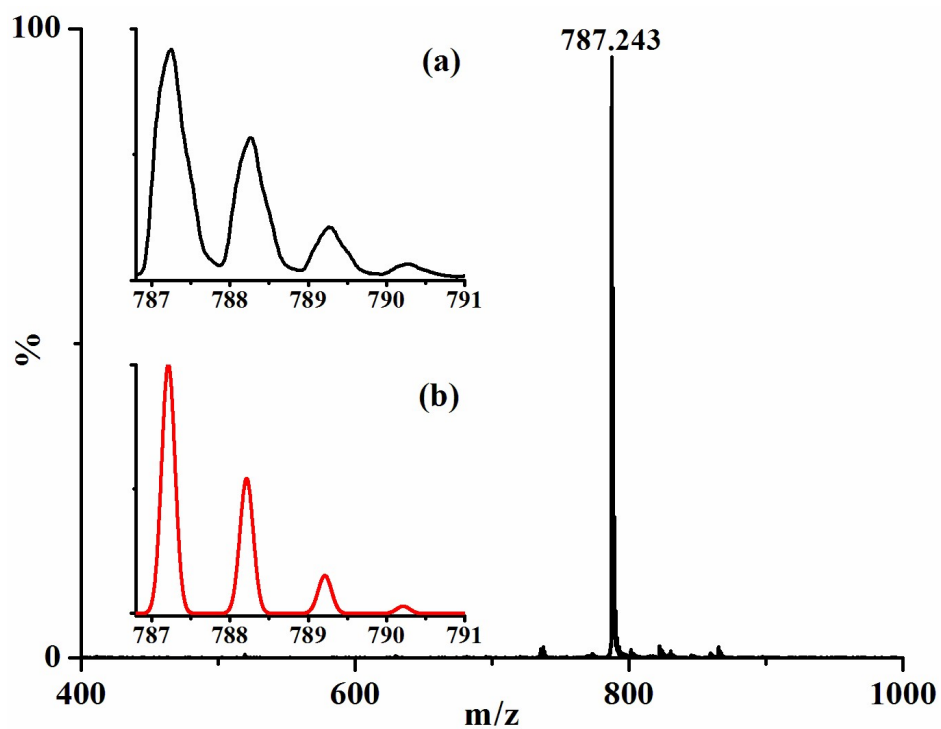

**Figure S6.** ESI-mass spectrum of complex **1a** in acetonitrile. [Inset: (a) experimental and (b) simulated isotopic distribution pattern].

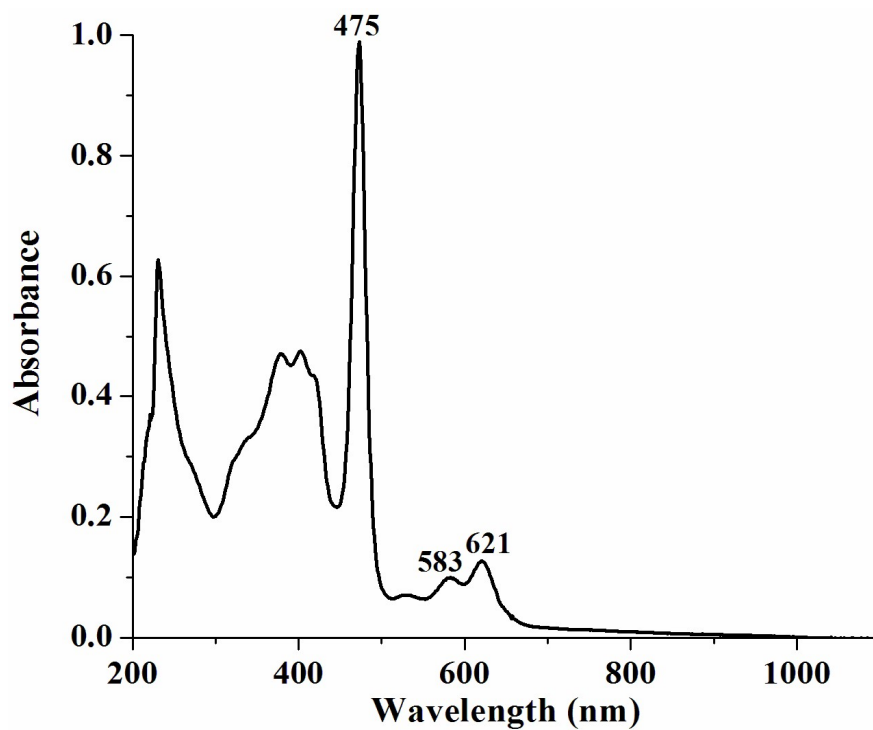

**Figure S7.** UV-visible spectrum of complex **1a** in dichloromethane at RT.

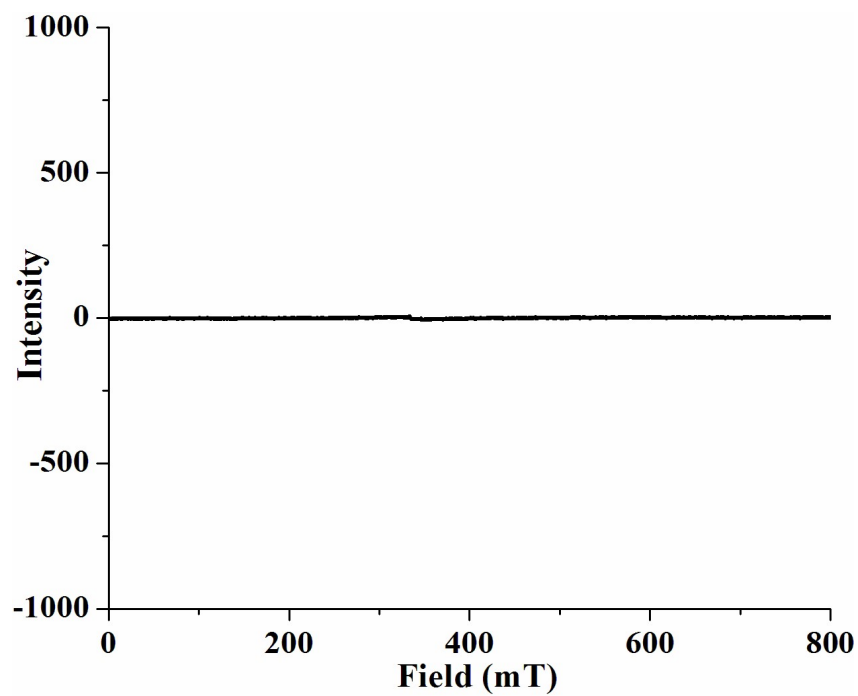

**Figure S8.** X-band EPR spectrum of complex **1a** in dichloromethane at 77K.

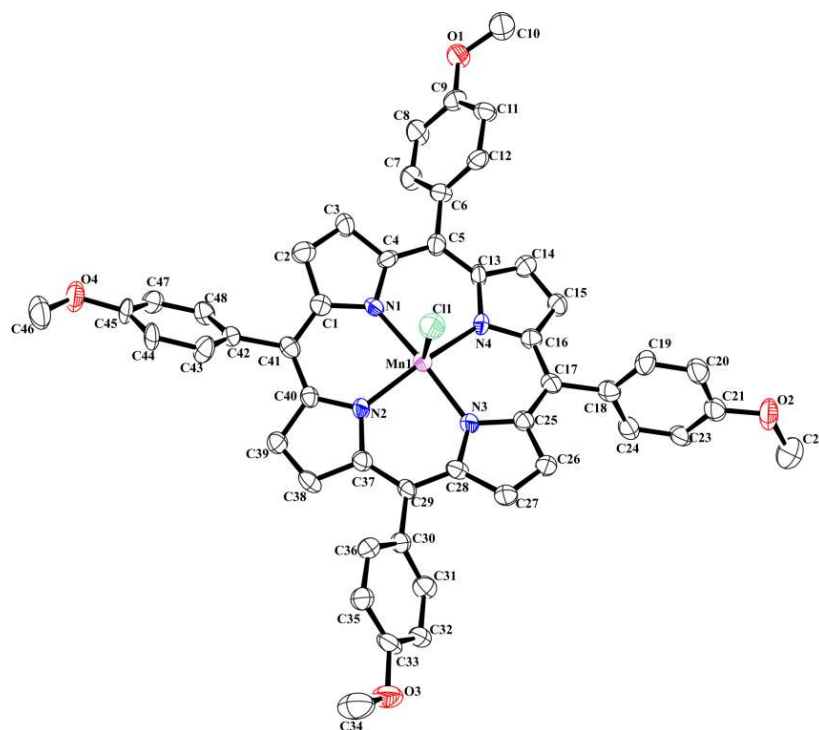

**Figure S9.** ORTEP diagram of complex **1a** (30% thermal ellipsoid plot, H-atoms are omitted for clarity).

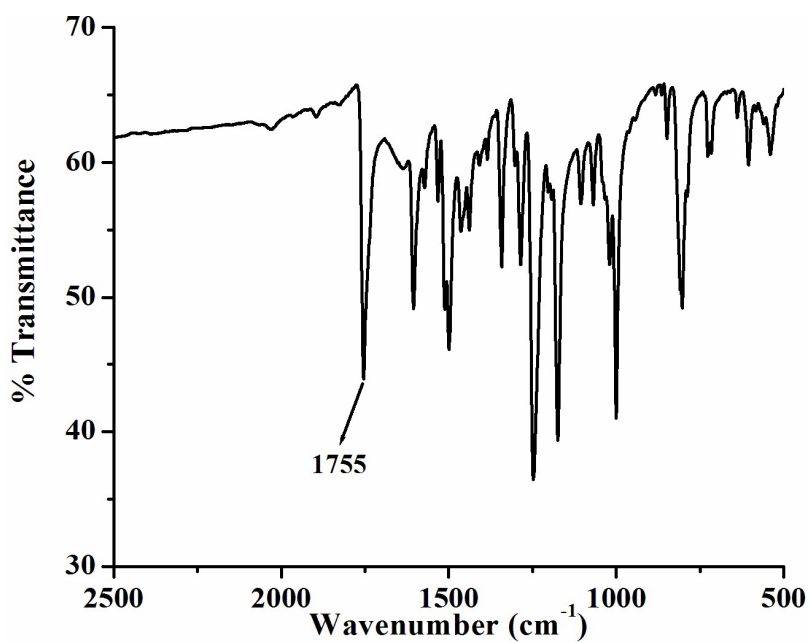

**Figure S10.** FT-IR spectrum of complex **1** in KBr.

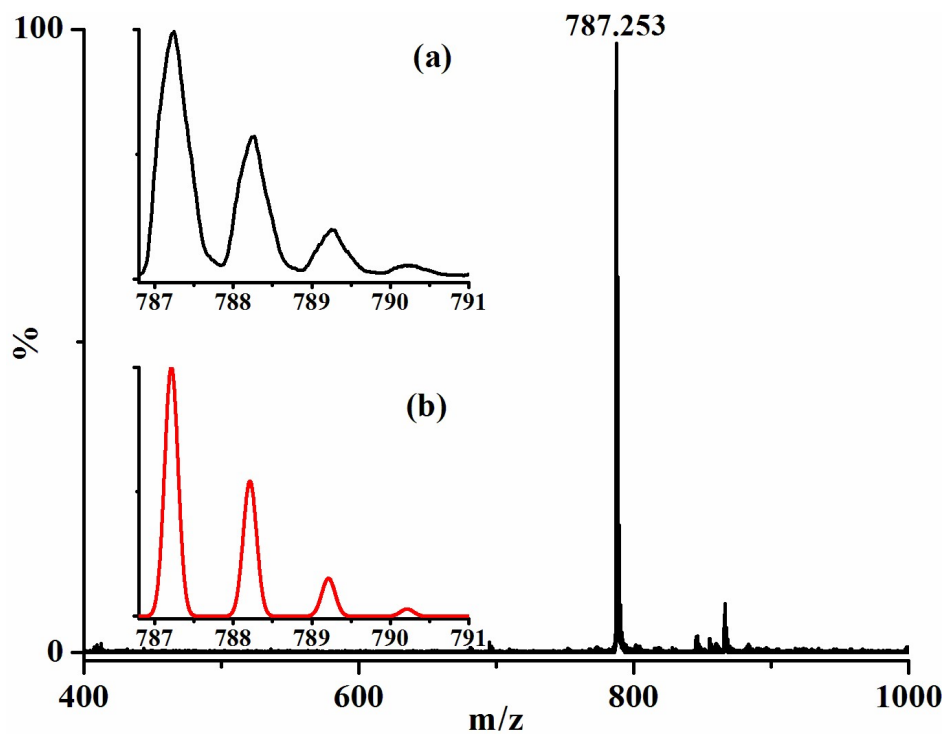

**Figure S11.** ESI-mass spectrum of complex 1 in acetonitrile. [Inset: (a) experimental and (b) simulated isotopic distribution pattern].

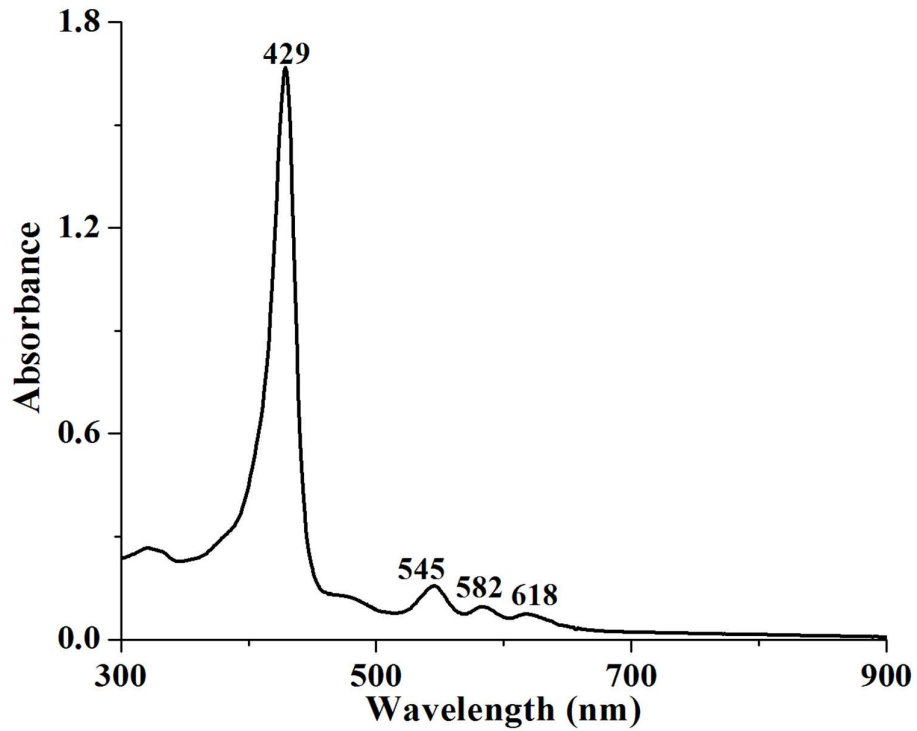

**Figure S12.** UV-visible spectrum of complex 1 in dichloromethane at RT.



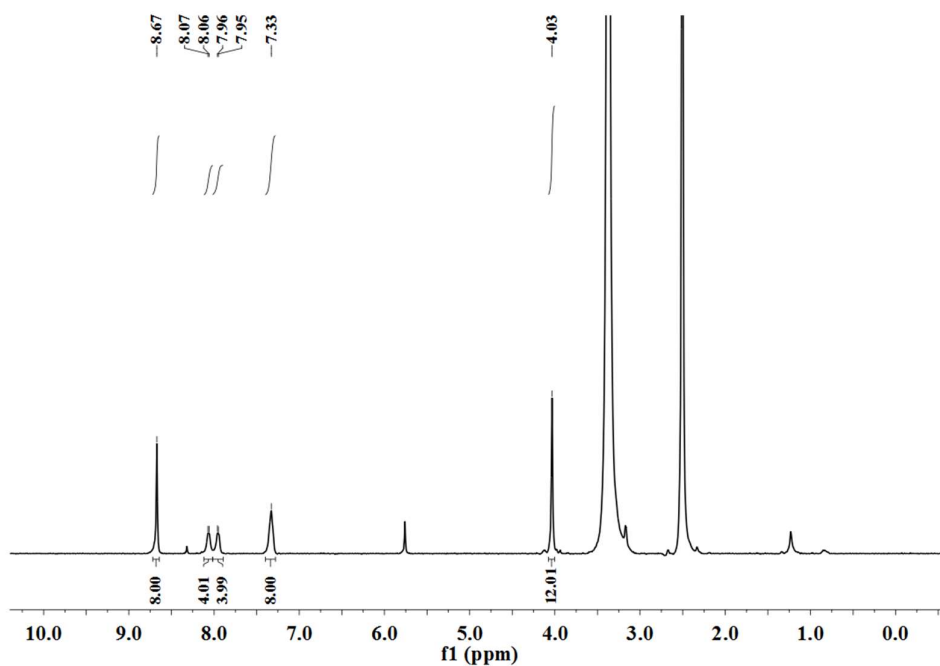

**Figure S13.** <sup>1</sup>H NMR spectrum of complex 1 in DMSO-d<sub>6</sub>.

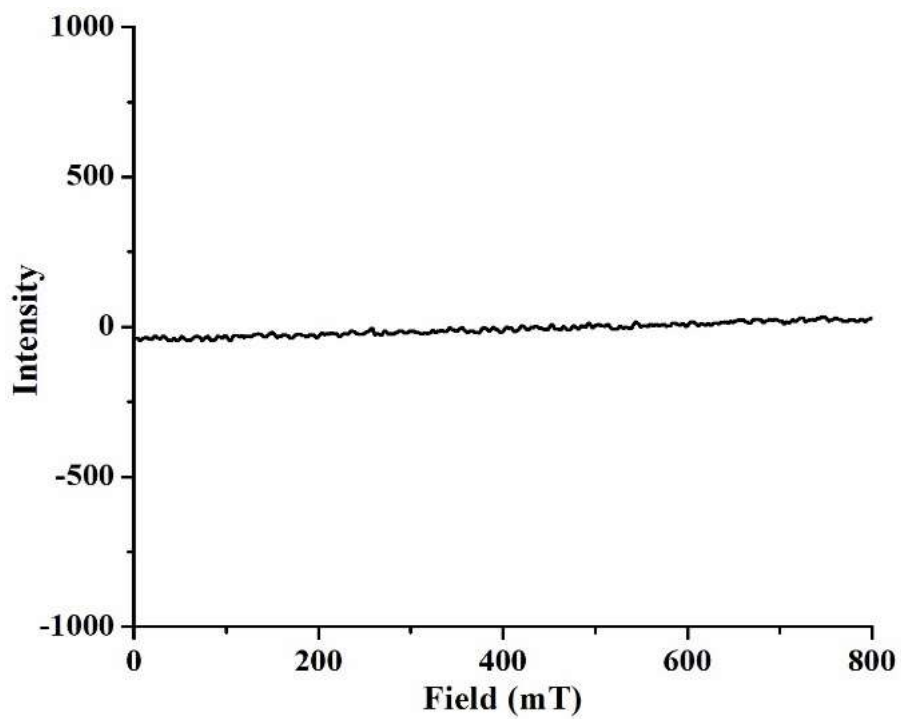

**Figure S14.** X-band EPR spectrum of complex 1 in THF at 77K.

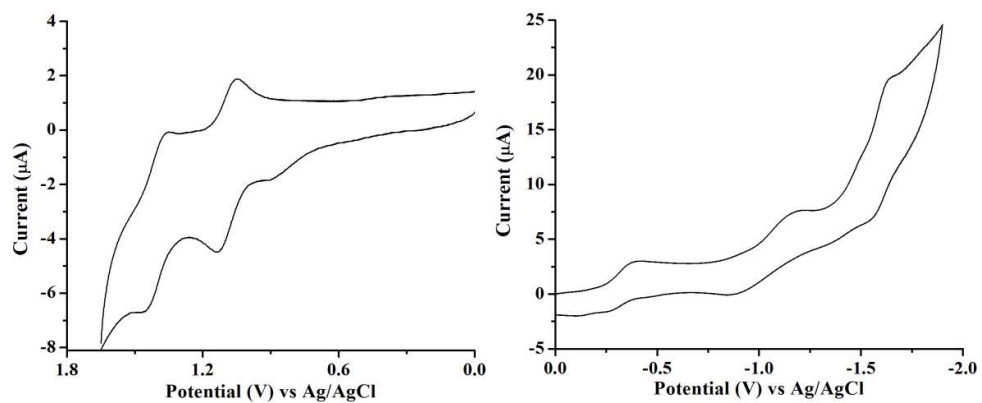

**Figure S15.** Cyclic voltammograms of complex **1** in dichloromethane vs. Ag/AgCl, supporting electrolyte 0.1 M TBAP, Scan rate 0.1 v/s.

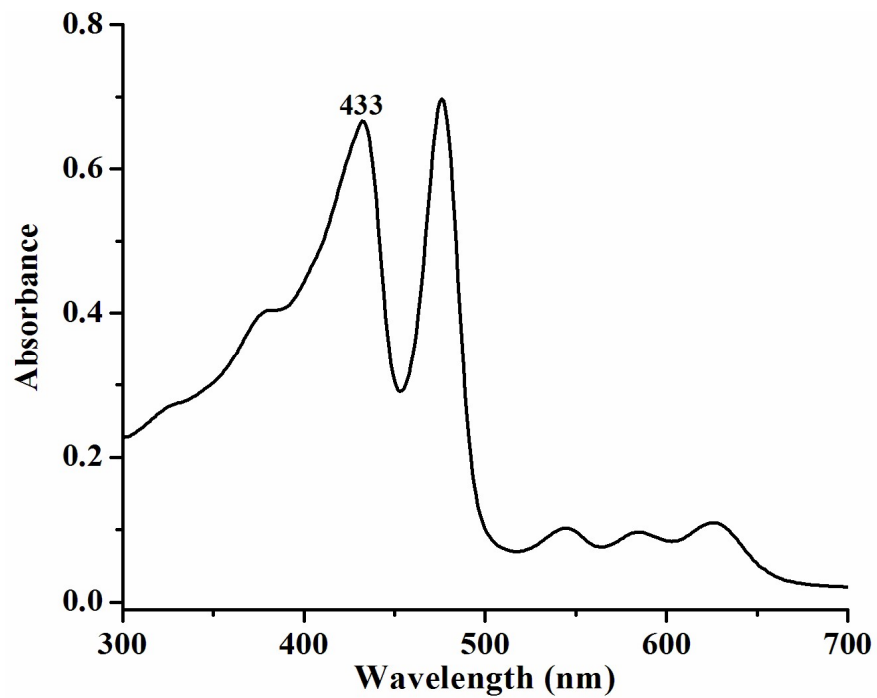

**Figure S16:** UV-visible spectrum of the reaction mixture of complex **1a** and *t*BuOOH at  $-40\text{ }^{\circ}\text{C}$  in THF.

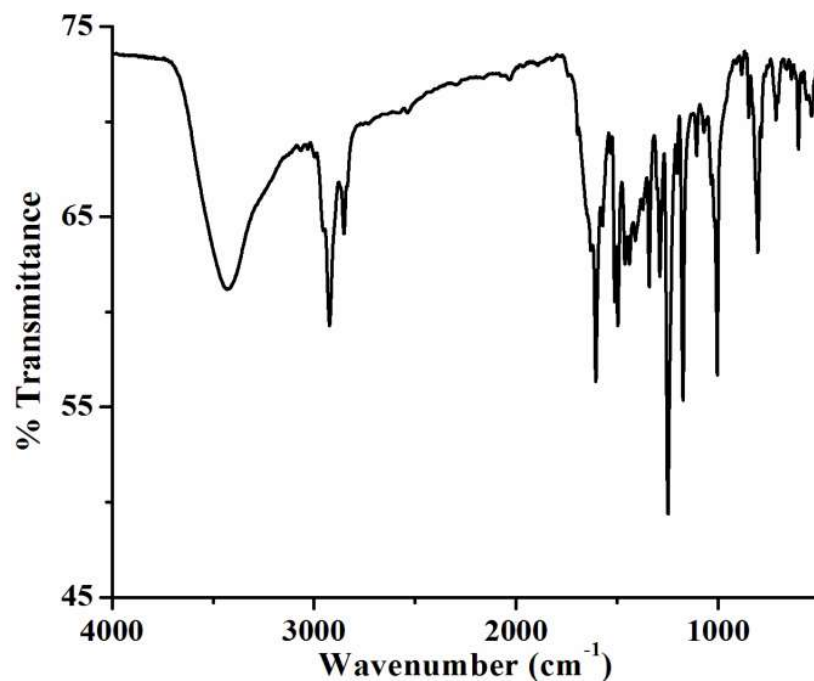

**Figure S17.** FT-IR spectrum of complex **2** in KBr.

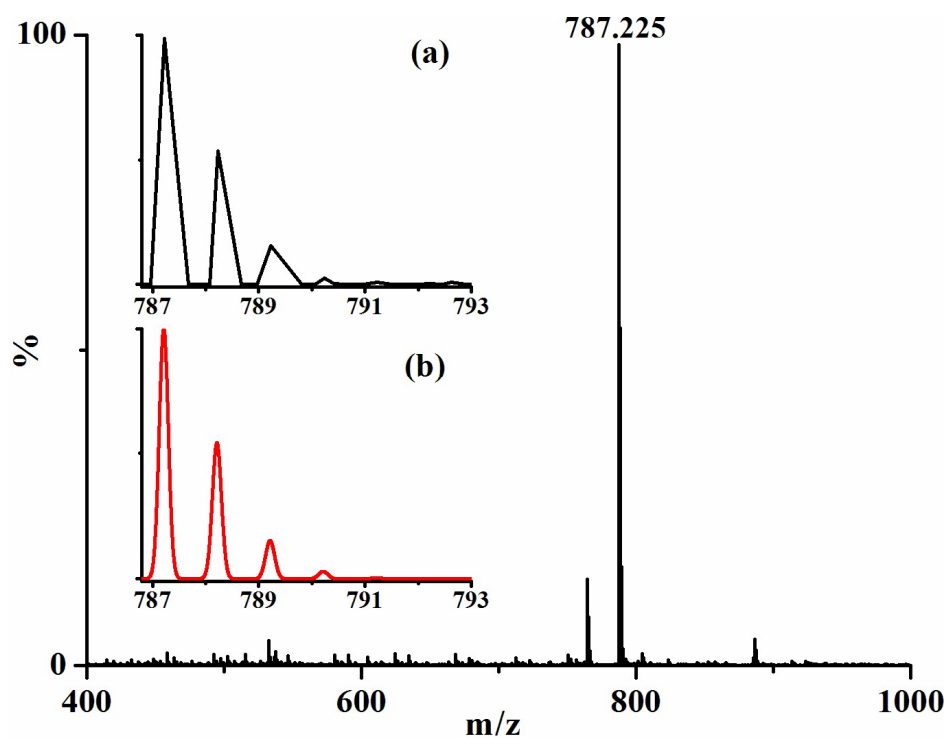

**Figure S18.** ESI-mass spectrum of complex **2** in acetonitrile. [Inset: (a) experimental and (b) simulated isotopic distribution pattern].

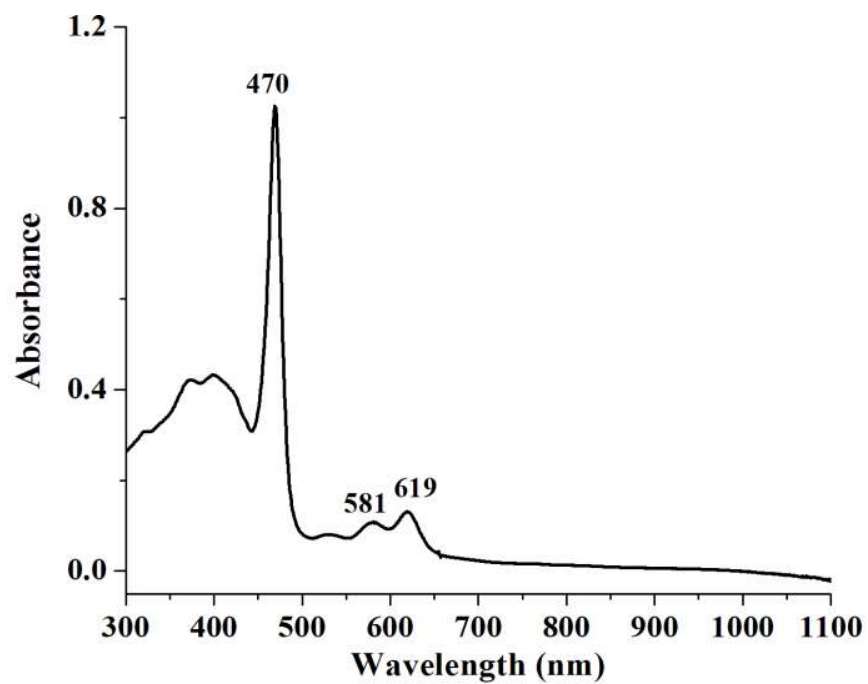

**Figure S19.** UV-visible spectrum of complex 2 in THF.

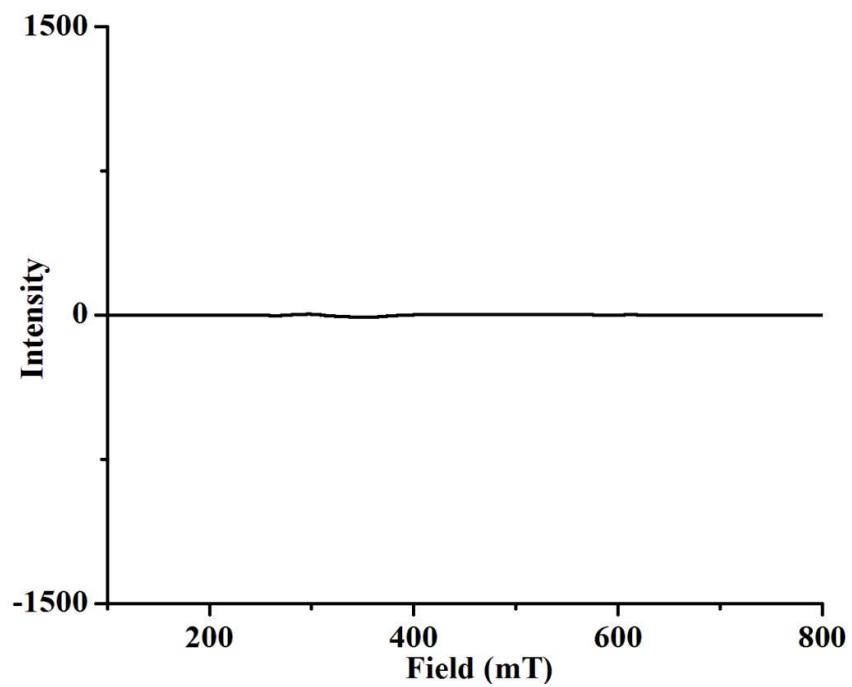

**Figure S20.** X-band EPR spectrum of complex 2 in THF at 77K.

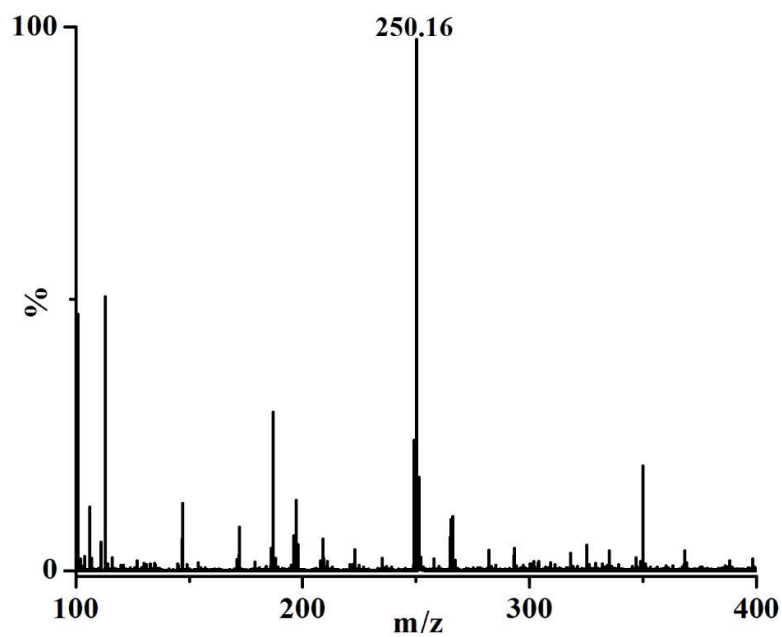

**Figure S21.** ESI-mass spectrum of 2,4-di-*tert*-butyl-6-nitrophenol in acetonitrile.

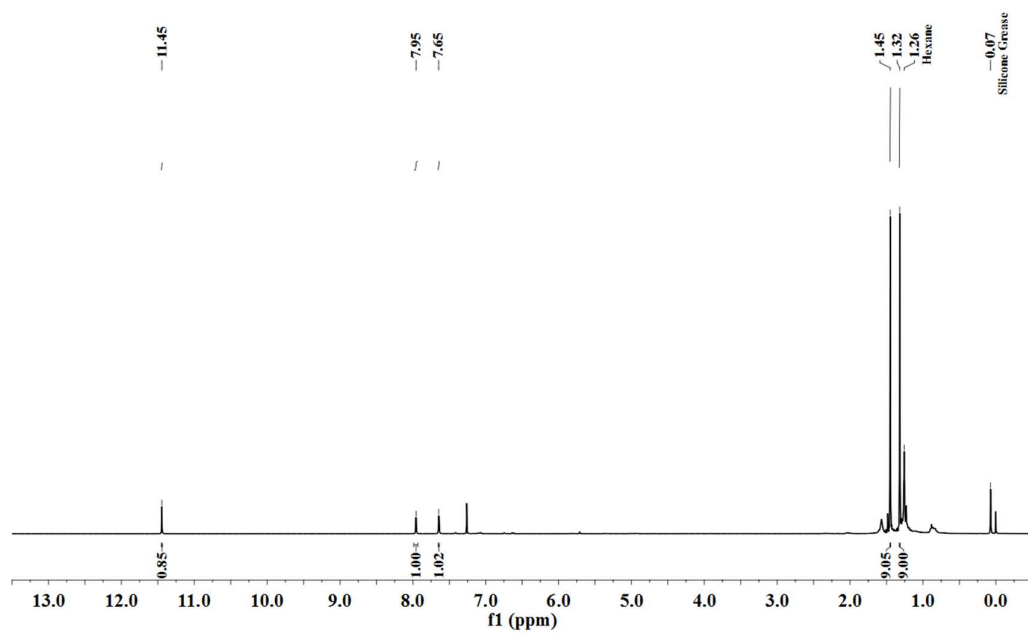

**Figure S22.** <sup>1</sup>H NMR spectrum of 2,4-di-*tert*-butyl-6-nitrophenol in CDCl<sub>3</sub>.

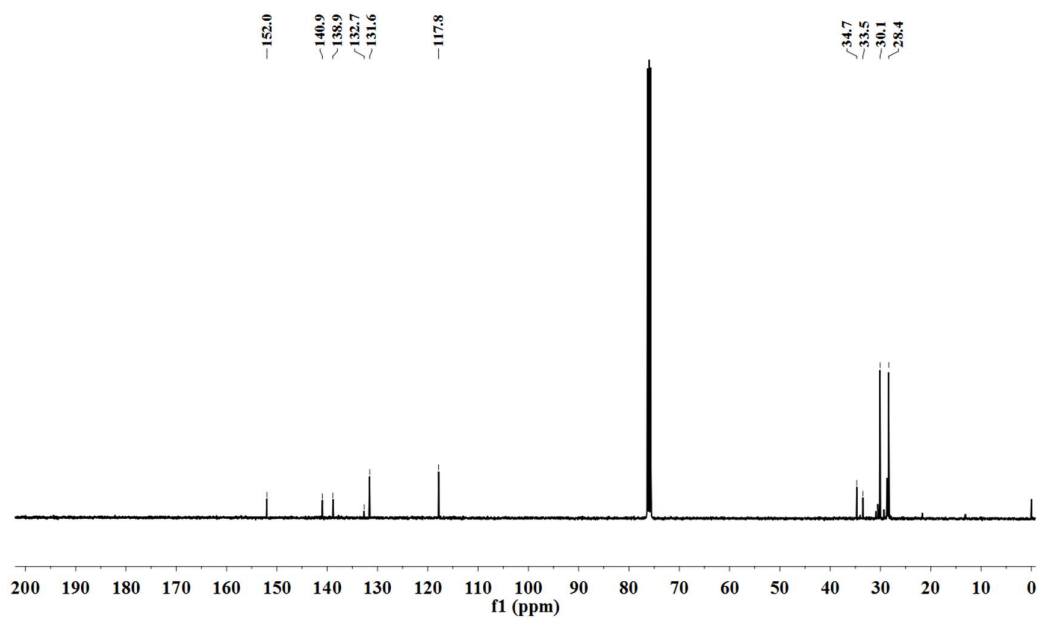

Figure S23.  $^{13}\text{C}$  NMR spectrum of 2,4-di-*tert*-butyl-6-nitrophenol in  $\text{CDCl}_3$ .

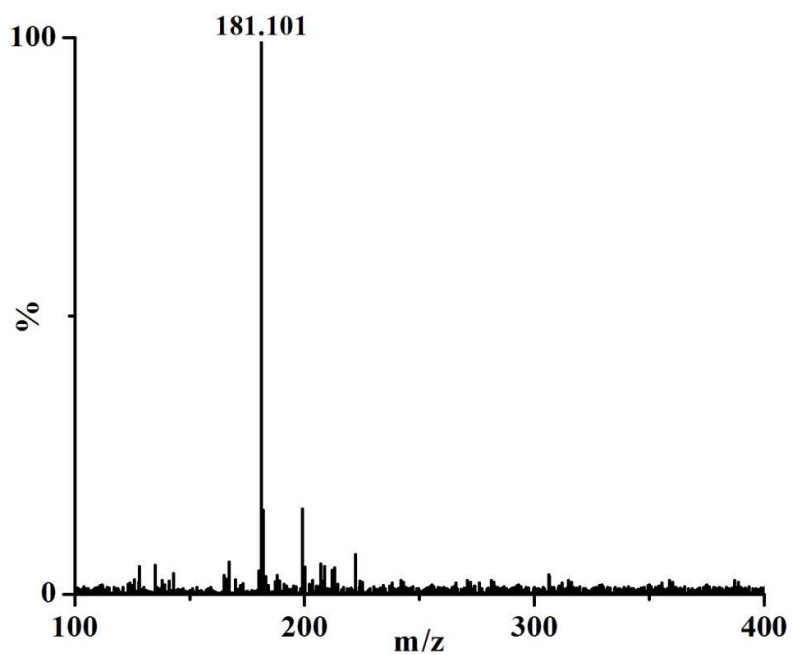

Figure S24. ESI-mass spectrum of 9-fluorenone in acetonitrile.

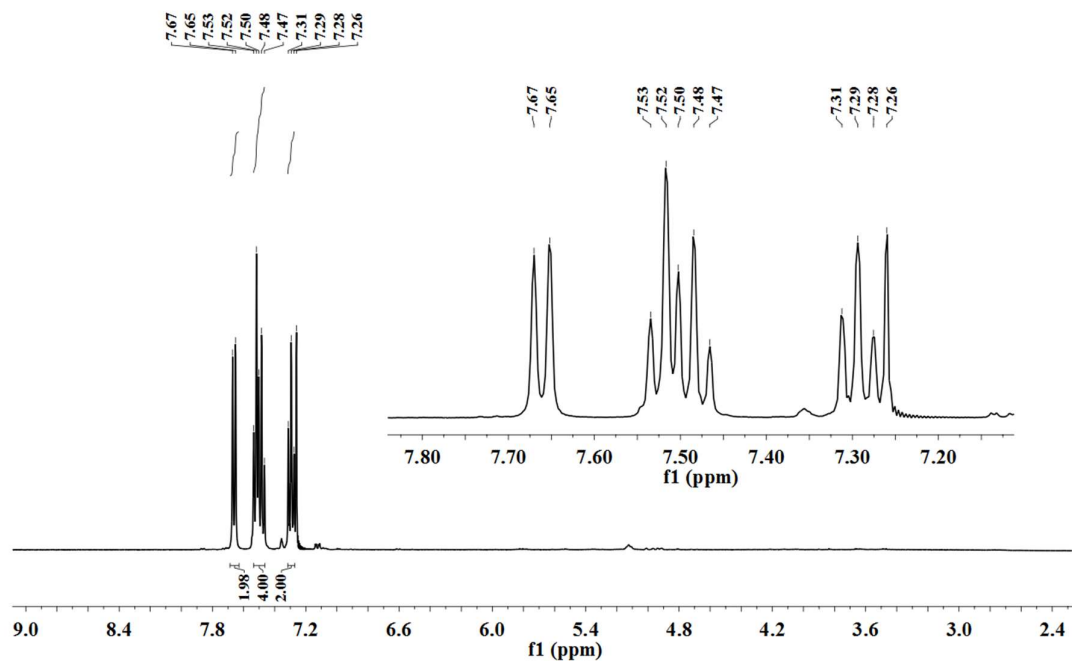

Figure S25.  $^1\text{H}$  NMR spectrum of 9-fluorenone in  $\text{CDCl}_3$ .

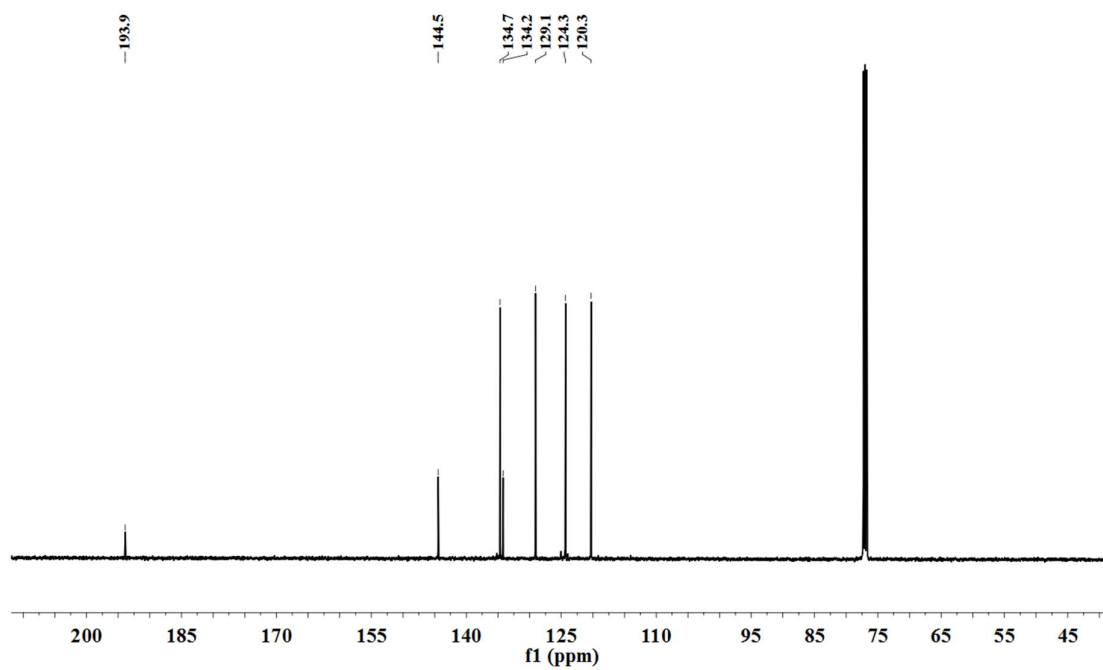

Figure S26.  $^{13}\text{C}$  NMR spectrum of 9-fluorenone in  $\text{CDCl}_3$ .

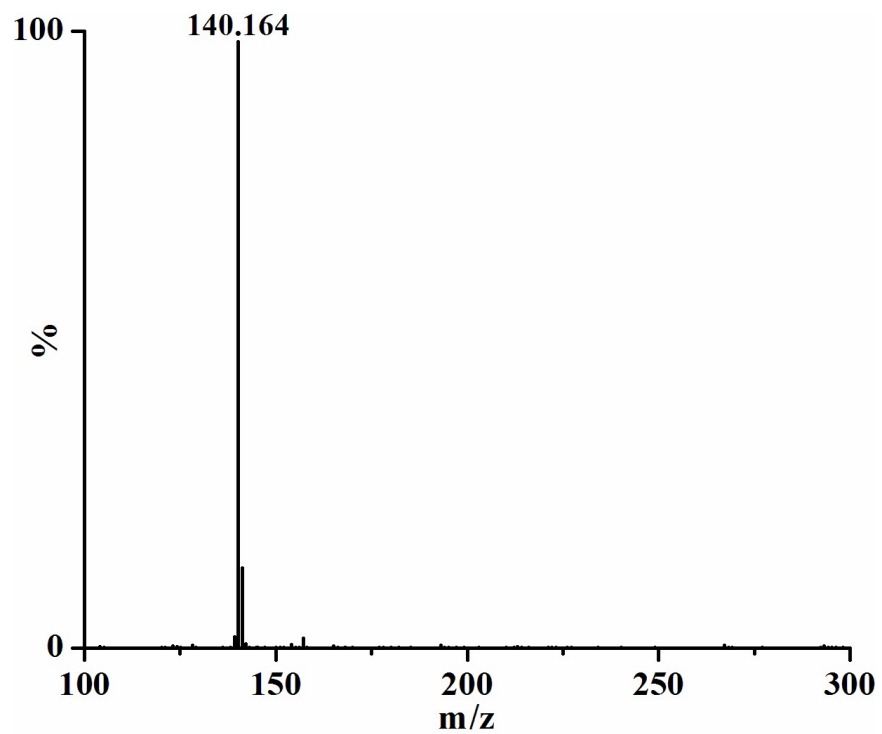

Figure S27. ESI-mass spectrum of tmpNO<sub>3</sub> in acetonitrile.

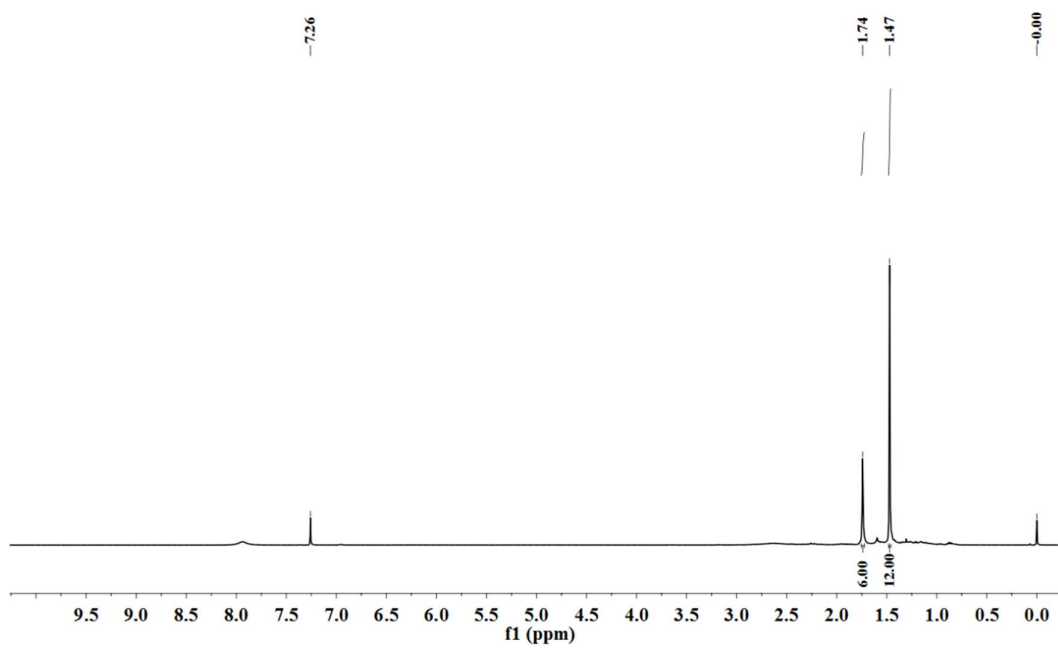

Figure S28. <sup>1</sup>H NMR spectrum of tmpNO<sub>3</sub> in CDCl<sub>3</sub>.



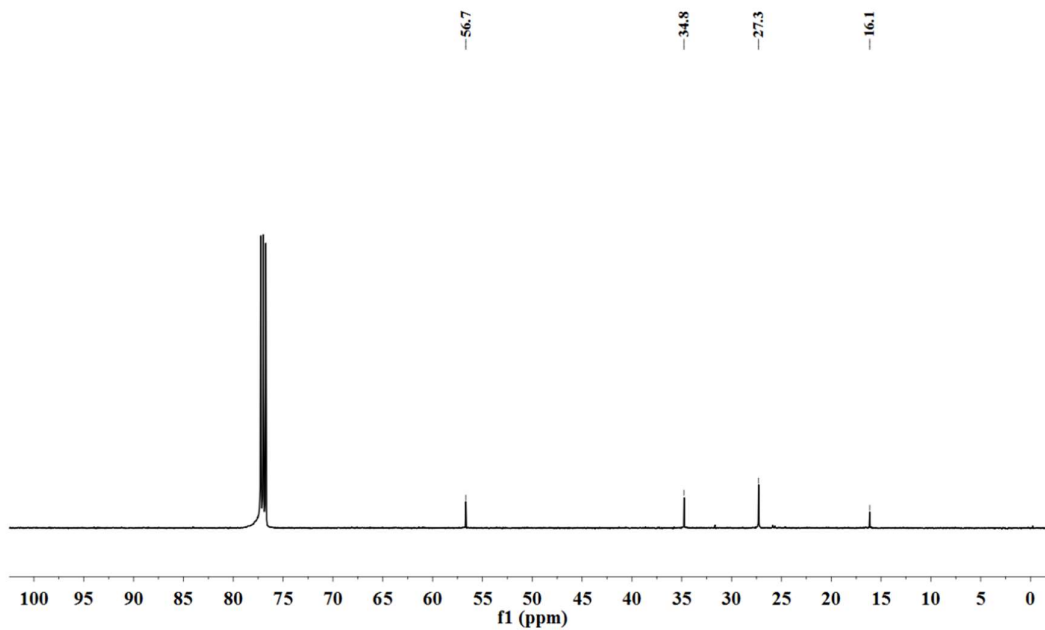

**Figure S29.**  $^{13}\text{C}$  NMR spectrum of tmpNO<sub>3</sub> in CDCl<sub>3</sub>.

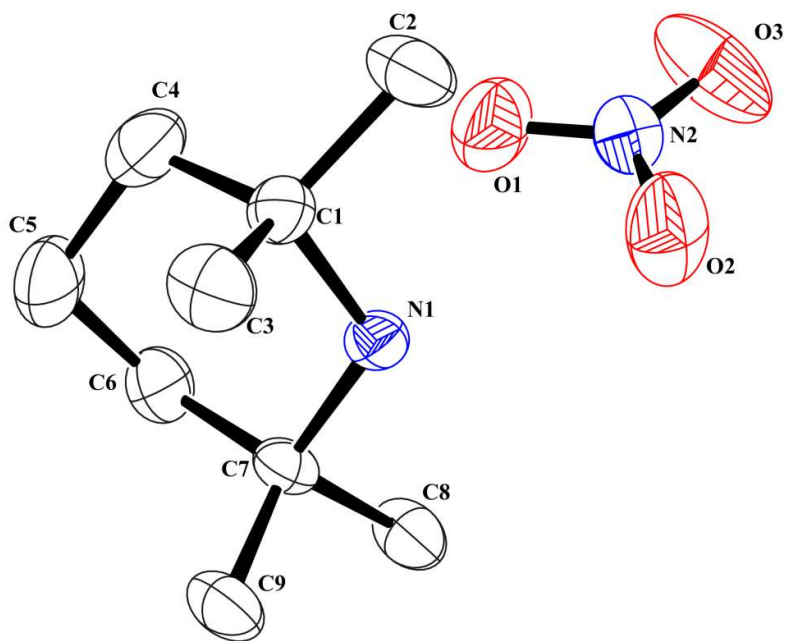

**Figure S30.** ORTEP diagram of tmpNO<sub>3</sub> (30% thermal ellipsoid plot, H-atoms are omitted for clarity).

**Table S1.** Crystallographic data for complex **2**.

|                                | <b>2</b>                                                         |
|--------------------------------|------------------------------------------------------------------|
| Formulae                       | C <sub>48</sub> H <sub>38</sub> N <sub>4</sub> O <sub>6</sub> Mn |
| Mol. wt.                       | 821.76                                                           |
| Crystal system                 | Monoclinic                                                       |
| Space group                    | P 21/c                                                           |
| Temperature /K                 | 100(2)                                                           |
| Wavelength /Å                  | 0.71073                                                          |
| <i>a</i> /Å                    | 9.8(2)                                                           |
| <i>b</i> /Å                    | 10.4(2)                                                          |
| <i>c</i> /Å                    | 21.2(4)                                                          |
| $\alpha$ /°                    | 90                                                               |
| $\beta$ /°                     | 111.6(7)                                                         |
| $\gamma$ /°                    | 90                                                               |
| V/ Å <sup>3</sup>              | 2009(68)                                                         |
| Z                              | 2                                                                |
| Density/Mgm <sup>-3</sup>      | 1.358                                                            |
| Abs. Coeff. /mm <sup>-1</sup>  | 0.385                                                            |
| Abs. correction                | none                                                             |
| F(000)                         | 854                                                              |
| Total no. of reflections       | 3524                                                             |
| Reflections, $I > 2\sigma(I)$  | 1310                                                             |
| Max. $2\theta$ /°              | 24.995                                                           |
| Ranges (h, k, l)               | -11 ≤ h ≤ 11<br>-12 ≤ k ≤ 12<br>-11 ≤ l ≤ 25                     |
| Complete to $2\theta$ (%)      | 0.998                                                            |
| Refinement method              | Full-matrix least-squares on $F^2$                               |
| Goof ( $F^2$ )                 | 0.841                                                            |
| R indices [ $I > 2\sigma(I)$ ] | 0.0904                                                           |
| R indices (all data)           | 0.1702                                                           |

**Table S2.** Selected bond lengths (Å) of complex **2**.

| <b>Atoms</b> | <b>2</b> |
|--------------|----------|
| Mn1-N1       | 1.91(3)  |
| Mn1-N2       | 1.95(3)  |
| Mn1-O1       | 2.13(3)  |
| C1-C2        | 1.28(2)  |
| C2-C3        | 1.37(3)  |
| C4-C5        | 1.49(2)  |
| C5-C6        | 1.32(2)  |
| C6-C7        | 1.37(2)  |

**Table S3.** Selected bond angles (°) of complex **2**.

| <b>Atoms</b> | <b>2</b>  |
|--------------|-----------|
| N1-Mn1-N2    | 86.8(12)  |
| N1-Mn1-O1    | 90.5(14)  |
| C1-C2-C3     | 105.2(11) |
| C5-C6-C7     | 119.3(14) |
| C8-O2-C9     | 119.8(7)  |
